# Supplementary material for: Effects of acidification time of MWCNTs on carbon dioxide capture of liquid-like MWCNTs organic hybrid materials
Source: Royal Society of Chemistry journal article supplement (doi:10.1039/c6ra16909k), 2016-01-01
Supplement: c6ra16909k1.pdf [file c6ra16909k1.pdf]

## Supporting Information

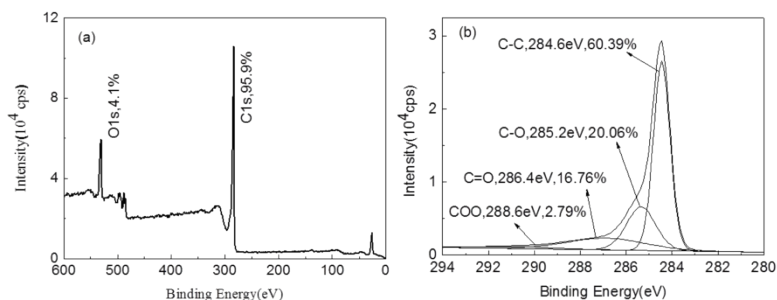

Figure.S1. XPS curves of pristine MWCNTs, (a) wide scan, (b) C1s narrow scan

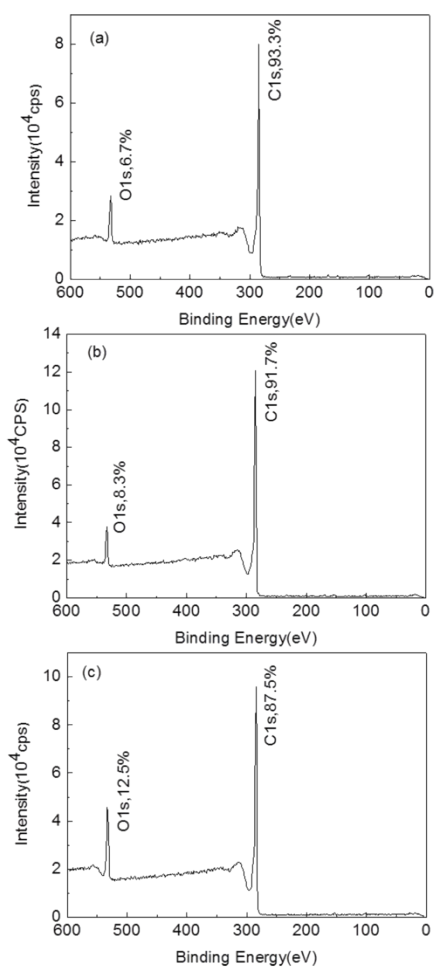

Figure.S2. XPS curves of wide scan of acid MWCNTs, (a) MWCNTs-3h, (b) MWCNTs-5h, (c) MWCNTs-7h

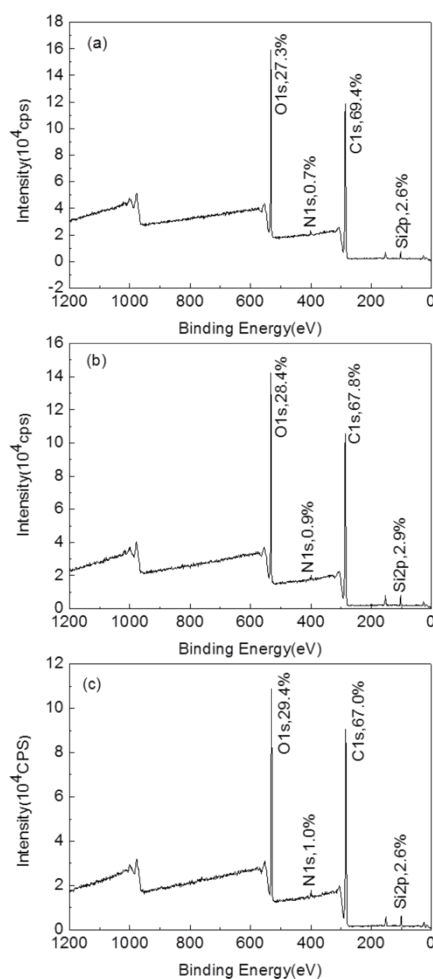

Figure.S3. XPS curves of wide scan of MWCNTs-NOHMs, (a) MWCNTs-NOHM-3h, (b) MWCNTs-NOHM-5h, (c) MWCNTs-NOHM-7h
